# Supplementary material for: A comparison of sensitized Ln(iii) emission using pyridine- and pyrazine-2,6-dicarboxylates
Source: Royal Society of Chemistry journal article supplement (doi:10.1039/c2dt30062a), 2012-01-01
Supplement: c2dt30062a.pdf [file c2dt30062a.pdf]

## Supporting Information

# A Comparison of Sensitised Ln(III) Emission with Pyradine- and Pyrazine-2,6-Dicarboxylates

*Evan G. Moore*

School of Chemistry, University of Melbourne, Parkville, VIC, 3010, Australia

Ph: +61 (0) 3 8344 5939, E-mail: [egmoore@unimelb.edu.au](mailto:egmoore@unimelb.edu.au)

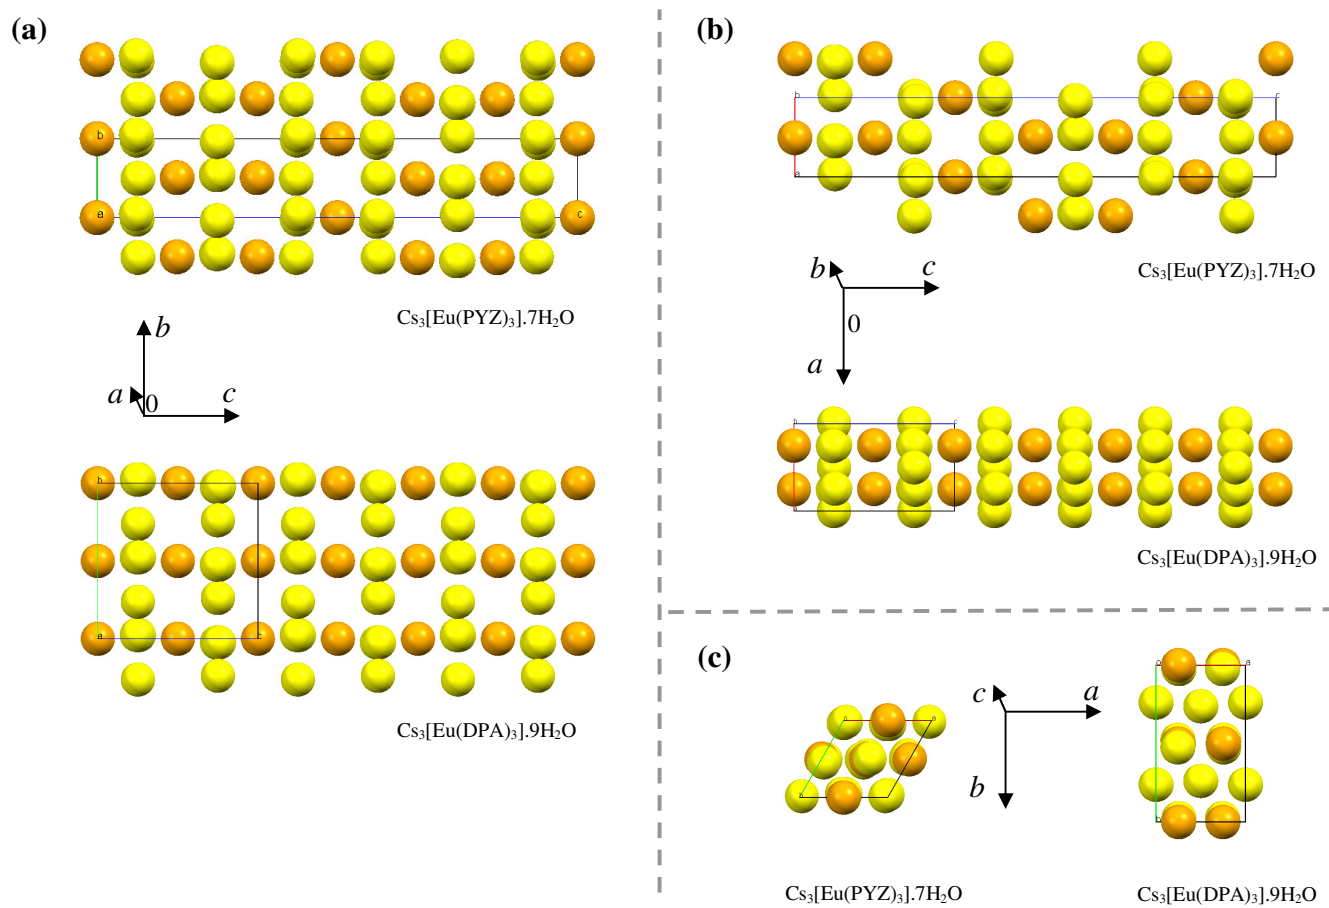

**Figure S1.** Comparison of unit cell packing diagrams for the  $\text{Cs}_3[\text{Eu}(\text{PYZ})_3] \cdot 7\text{H}_2\text{O}$  and  $\text{Cs}_3[\text{Eu}(\text{DPA})_3] \cdot 9\text{H}_2\text{O}$  complexes (a) as viewed down the crystallographic  $a$ -axis (b) as viewed down the crystallographic  $b$ -axis and (c) as viewed down the crystallographic  $c$ -axis. The Eu(III) and Cs(I) metal centers are represented as orange and yellow spheres respectively. Remaining non-metal atoms are omitted for clarity.

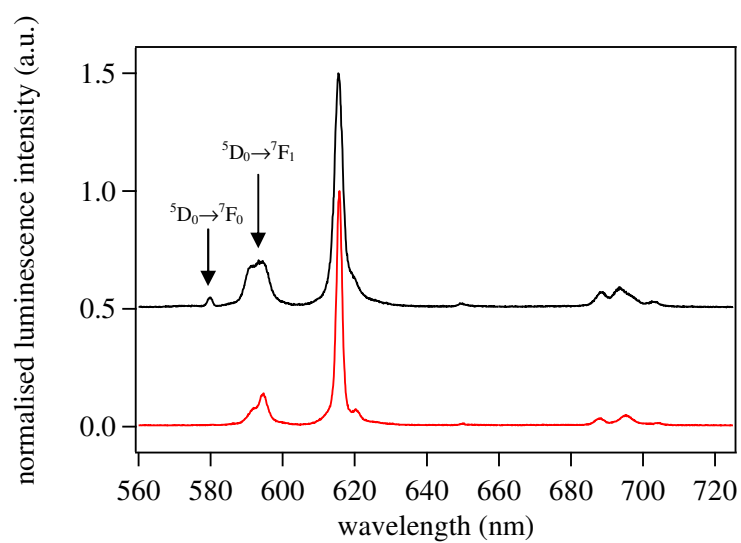

**Figure S2.** Comparison of the normalized luminescence spectra for *ca.* 50  $\mu\text{M}$  solutions of  $[\text{Eu}(\text{PYZ})_3]^{3-}$  (top, black) and  $[\text{Eu}(\text{DPA})_3]^{3-}$  (bottom, red) in 0.1 M HEPES buffer at pH 7.4. The  $[\text{Eu}(\text{PYZ})_3]^{3-}$  spectrum is offset for clarity.

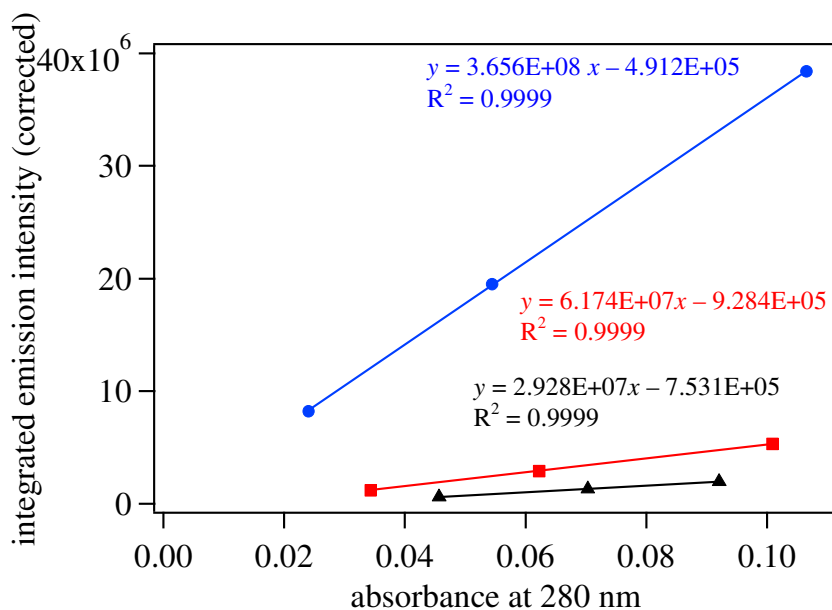

Using the Equation  $\frac{\Phi_x}{\Phi_r} = \left[ \frac{A_r(\lambda_r)}{A_x(\lambda_x)} \right] \left[ \frac{I(\lambda_r)}{I(\lambda_x)} \right] \left[ \frac{\eta_x^2}{\eta_r^2} \right] \left[ \frac{D_x}{D_r} \right]$ ,

$$\Phi_r = 0.54,$$

$$\eta_x (\text{H}_2\text{O}) = 1.33,$$

$$\eta_r (\text{MeOH}) = 1.329,$$

$$\text{and } I(\lambda_r) = I(\lambda_x)$$

$$\Rightarrow \text{slopes of standard} = D_r / A_r(\lambda_r)$$

$$\Rightarrow \text{slope of unknown(s)} = D_x / A_x(\lambda_x)$$

$$\Rightarrow \text{slope of unknown / slope of standard} = [D_x / A_x(\lambda_x)] * [A_r(\lambda_r) / D_r]$$

$$\begin{aligned} \Phi_{\text{Eu(DPA)}_3} &= (6.174\text{e}7 / 3.656\text{e}8) * (1.33^2 / 1.329^2) * 0.54 \\ &= 0.0913 (\sim 9.1\%) \end{aligned}$$

$$\begin{aligned} \Phi_{\text{Eu(PYZ)}_3} &= (2.928\text{e}7 / 3.656\text{e}8) * (1.33^2 / 1.329^2) * 0.54 \\ &= 0.0434 (\sim 4.3\%) \end{aligned}$$

**Figure S3.** Quantum yield determinations for *ca.* 2-6  $\mu\text{M}$  solutions of  $[\text{Eu}(\text{PYZ})_3]^{3-}$  (black triangles) and  $[\text{Eu}(\text{DPA})_3]^{3-}$  (red squares) in 0.1 M HEPES buffer at pH 7.4 vs Cresol Violet Perchlorate in MeOH (blue circles) ( $\Phi_{\text{ref}} = 0.54$ ) as a quantum yield standard.
